# Supplementary material for: Band alignment of TiO2 by controling Cl content for high-efficiency perovskite solar cells
Source: Royal Society of Chemistry journal article supplement (doi:10.1039/d4tc01495b), 2024-01-01
Supplement: d4tc01495b1.pdf [file d4tc01495b1.pdf]

## Supporting information

### **Band alignment of TiO<sub>2</sub> through controlling Cl content for high-efficiency perovskite solar cells**

Long Ji,<sup>a</sup> Ting Zhang,<sup>a</sup> Shibin Li,<sup>a\*</sup>

<sup>a</sup>School of Optoelectronic Science and Engineering, University of Electronic Science and Technology of China (UESTC), Chengdu, Sichuan 610054, China

\*Corresponding author. E-mail: shibinli@uestc.edu.cn.

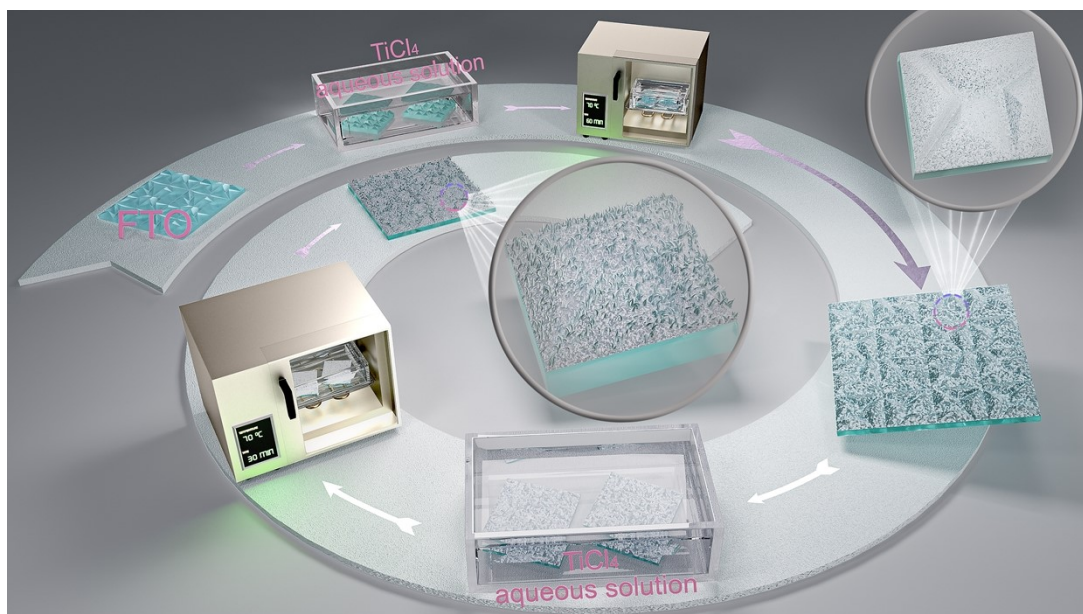

Figure S1 Diagram of TiO<sub>2</sub> preparation process

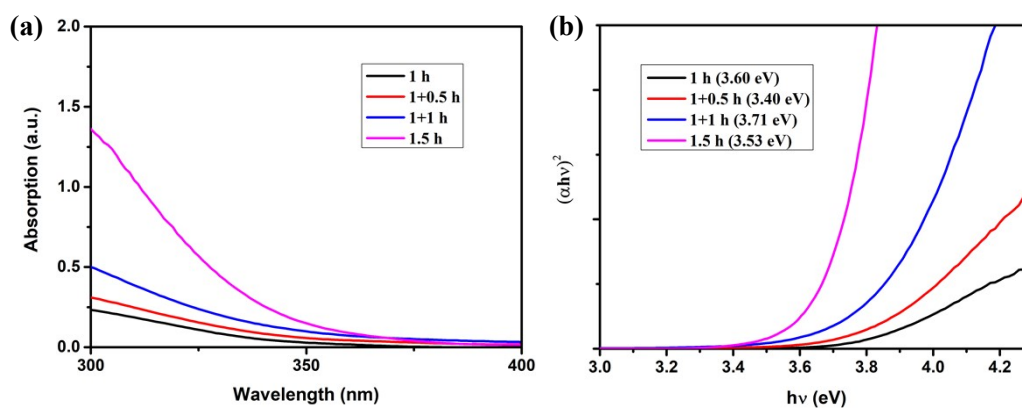

Figure S2 TiO<sub>2</sub> absorption and energy band changes at different growth times. (a) TiO<sub>2</sub> absorption plots at different growth times. (b) TiO<sub>2</sub> Tauc-plot plots with different growth times.

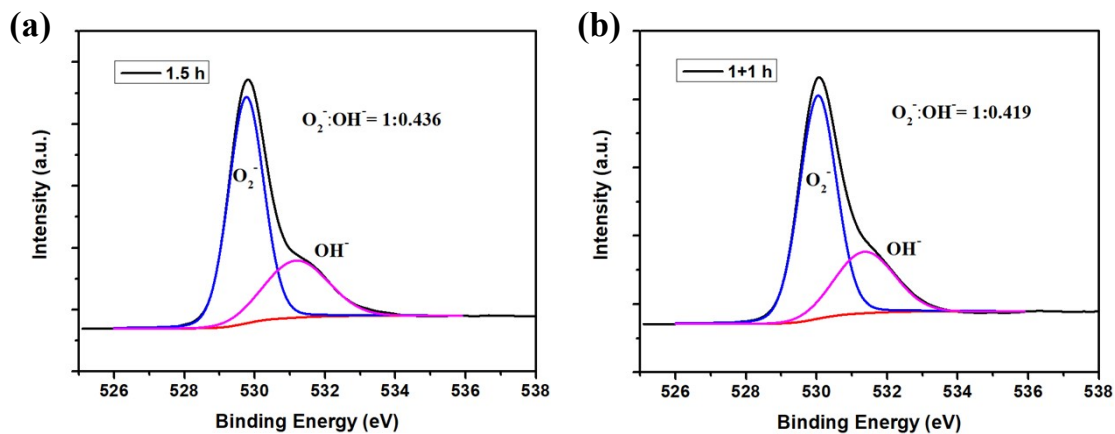

Figure S3 XPS test diagram of TiO<sub>2</sub> surface with different growth time. (a) 1.5 h. (b) 1+1 h.

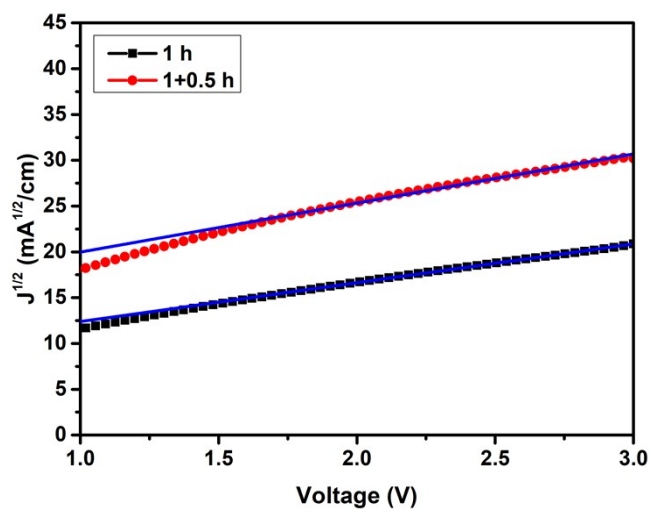

Figure S4 The electron mobility of TiO<sub>2</sub> was evaluated using the SCLC model.

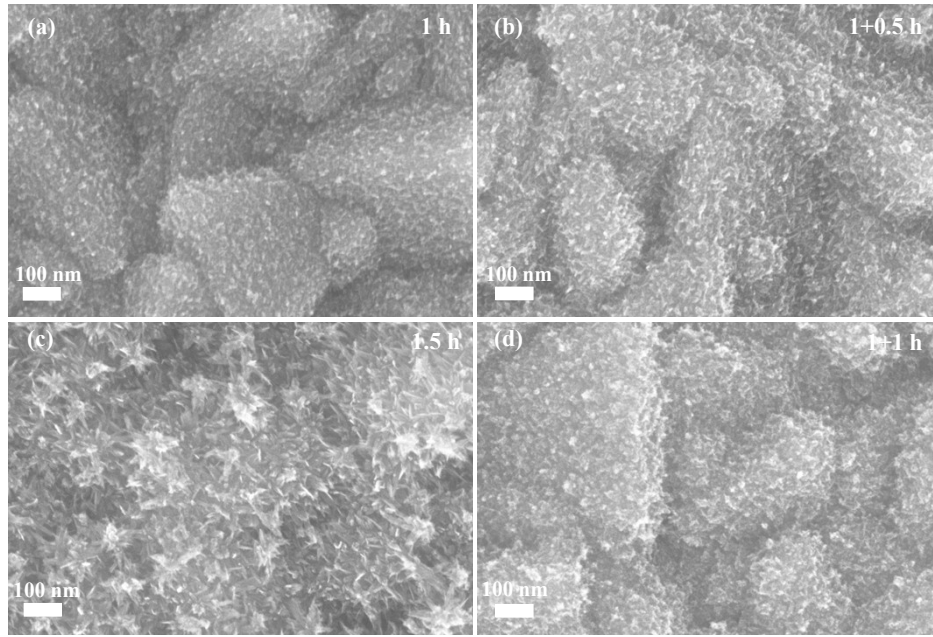

Figure S5 SEM images of  $\text{TiO}_2$  surface at different growth times. (a)1 h. (b)1+0.5 h. (c)1.5 h. (d)1+1 h.

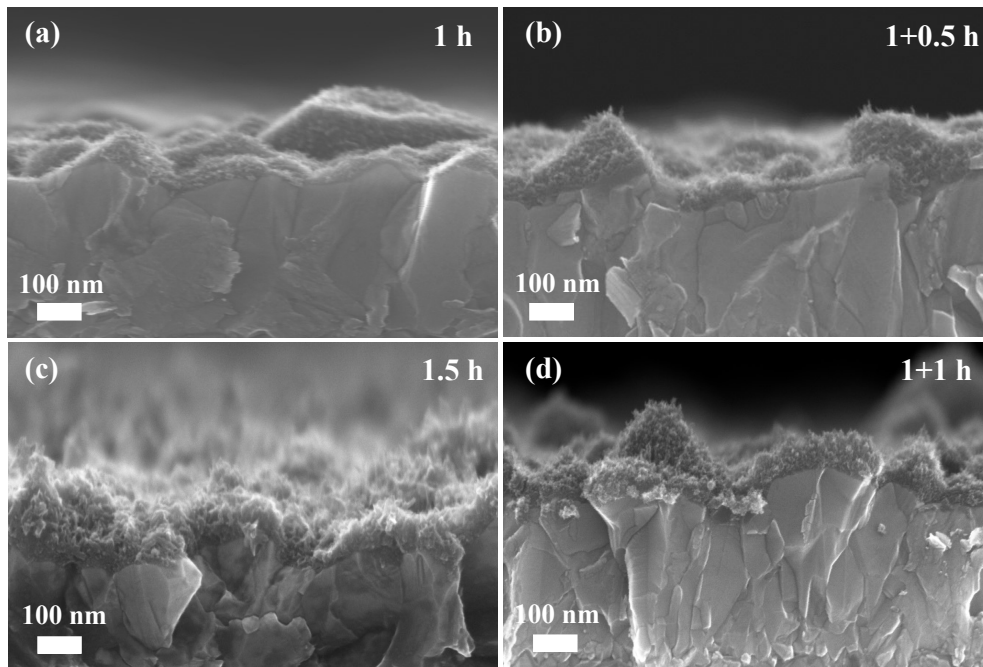

Figure S6 SEM images of  $\text{TiO}_2$  growing at different times. (a)1 h. (b)1+0.5 h. (c)1.5 h. (d)1+1 h.

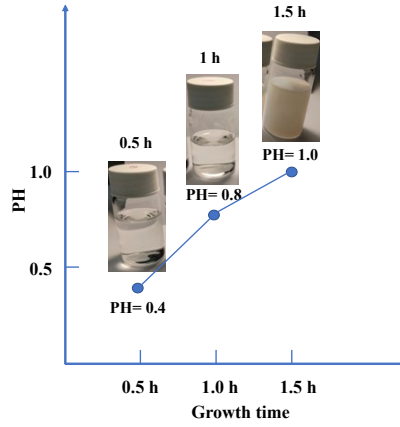

Figure S7 PH value of TiO<sub>2</sub> solution grown at different times

Table S1 Average carrier lifetime of perovskite films prepared on 1 h and 1+0.5 h TiO<sub>2</sub> films

| Growth time | $\tau_1/\text{ns}(A_1)$ | $\tau_2/\text{ns}(A_2)$ | $\tau_{\text{ave}}/\text{ns}$ |
|-------------|-------------------------|-------------------------|-------------------------------|
| 1 h         | 92.44 (0.092)           | 890.62 (0.876)          | 882.01                        |
| 1+0.5 h     | 83.63 (0.151)           | 629.33 (0.799)          | 615.96                        |
